# Supplementary material for: Multi-locus phylogeny and taxonomy of an unresolved, heterogeneous species complex within the genus Golovinomyces (Ascomycota, Erysiphales), including G. ambrosiae, G. circumfusus and G. spadiceus
Source: PubMed Central journal article supplement (PMC7059721; doi:10.1186/s12866-020-01731-9), 2020-03-05
Supplement: 12866_2020_1731_MOESM1_ESM.pdf [file 12866_2020_1731_MOESM1_ESM.pdf]

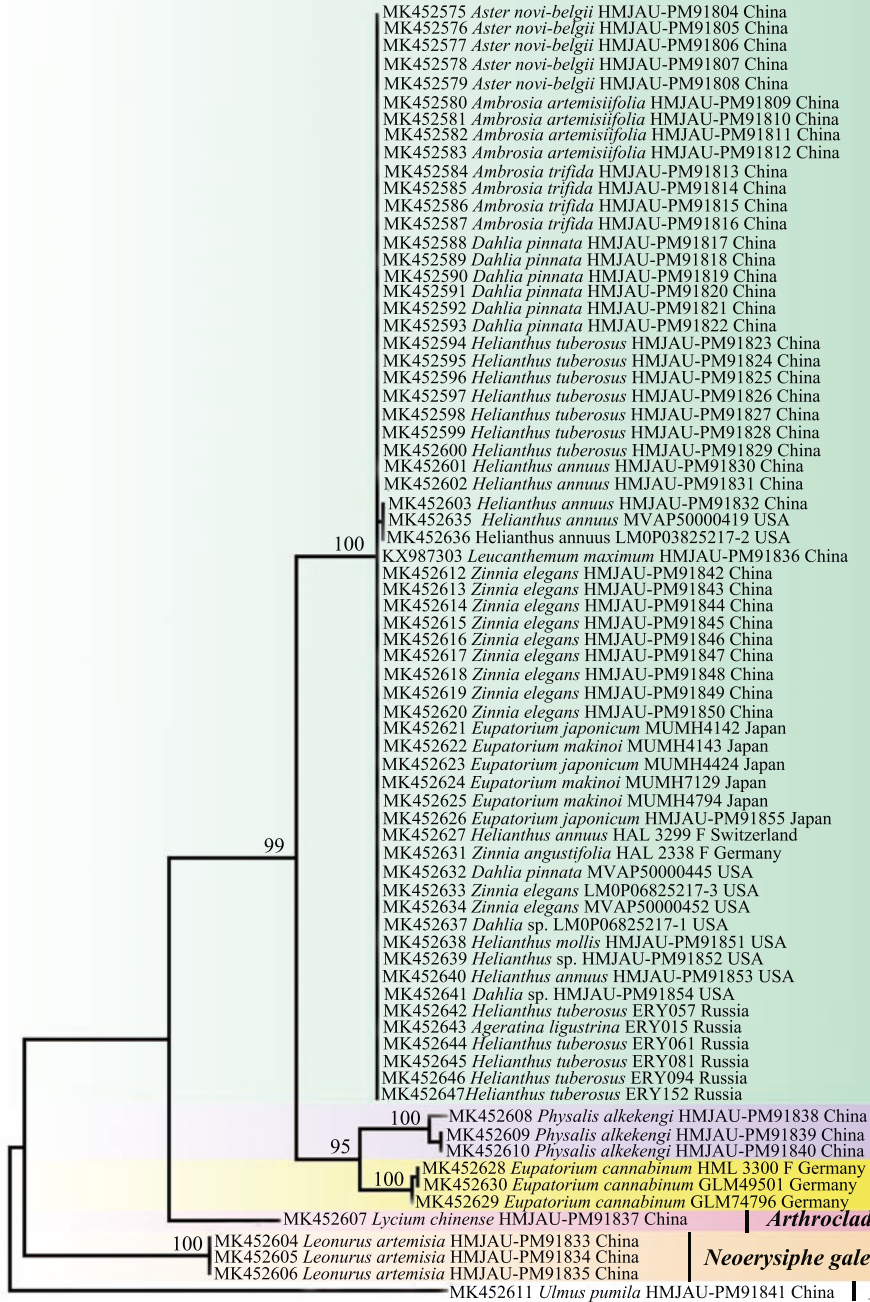

MK452575 *Aster novi-belgii* HMJAU-PM91804 China  
 MK452576 *Aster novi-belgii* HMJAU-PM91805 China  
 MK452577 *Aster novi-belgii* HMJAU-PM91806 China  
 MK452578 *Aster novi-belgii* HMJAU-PM91807 China  
 MK452579 *Aster novi-belgii* HMJAU-PM91808 China  
 MK452580 *Ambrosia artemisiifolia* HMJAU-PM91809 China  
 MK452581 *Ambrosia artemisiifolia* HMJAU-PM91810 China  
 MK452582 *Ambrosia artemisiifolia* HMJAU-PM91811 China  
 MK452583 *Ambrosia artemisiifolia* HMJAU-PM91812 China  
 MK452584 *Ambrosia trifida* HMJAU-PM91813 China  
 MK452585 *Ambrosia trifida* HMJAU-PM91814 China  
 MK452586 *Ambrosia trifida* HMJAU-PM91815 China  
 MK452587 *Ambrosia trifida* HMJAU-PM91816 China  
 MK452588 *Dahlia pinnata* HMJAU-PM91817 China  
 MK452589 *Dahlia pinnata* HMJAU-PM91818 China  
 MK452590 *Dahlia pinnata* HMJAU-PM91819 China  
 MK452591 *Dahlia pinnata* HMJAU-PM91820 China  
 MK452592 *Dahlia pinnata* HMJAU-PM91821 China  
 MK452593 *Dahlia pinnata* HMJAU-PM91822 China  
 MK452594 *Helianthus tuberosus* HMJAU-PM91823 China  
 MK452595 *Helianthus tuberosus* HMJAU-PM91824 China  
 MK452596 *Helianthus tuberosus* HMJAU-PM91825 China  
 MK452597 *Helianthus tuberosus* HMJAU-PM91826 China  
 MK452598 *Helianthus tuberosus* HMJAU-PM91827 China  
 MK452599 *Helianthus tuberosus* HMJAU-PM91828 China  
 MK452600 *Helianthus tuberosus* HMJAU-PM91829 China  
 MK452601 *Helianthus annuus* HMJAU-PM91830 China  
 MK452602 *Helianthus annuus* HMJAU-PM91831 China  
 MK452603 *Helianthus annuus* HMJAU-PM91832 China  
 MK452635 *Helianthus annuus* MVAP50000419 USA  
 MK452636 *Helianthus annuus* LM0P03825217-2 USA  
 KX987303 *Leucanthemum maximum* HMJAU-PM91836 China  
 MK452612 *Zinnia elegans* HMJAU-PM91842 China  
 MK452613 *Zinnia elegans* HMJAU-PM91843 China  
 MK452614 *Zinnia elegans* HMJAU-PM91844 China  
 MK452615 *Zinnia elegans* HMJAU-PM91845 China  
 MK452616 *Zinnia elegans* HMJAU-PM91846 China  
 MK452617 *Zinnia elegans* HMJAU-PM91847 China  
 MK452618 *Zinnia elegans* HMJAU-PM91848 China  
 MK452619 *Zinnia elegans* HMJAU-PM91849 China  
 MK452620 *Zinnia elegans* HMJAU-PM91850 China  
 MK452621 *Eupatorium japonicum* MUMH4142 Japan  
 MK452622 *Eupatorium makinoi* MUMH4143 Japan  
 MK452623 *Eupatorium japonicum* MUMH4424 Japan  
 MK452624 *Eupatorium makinoi* MUMH7129 Japan  
 MK452625 *Eupatorium makinoi* MUMH4794 Japan  
 MK452626 *Eupatorium japonicum* HMJAU-PM91855 Japan  
 MK452627 *Helianthus annuus* HAL 3299 F Switzerland  
 MK452631 *Zinnia angustifolia* HAL 2338 F Germany  
 MK452632 *Dahlia pinnata* MVAP50000445 USA  
 MK452633 *Zinnia elegans* LM0P06825217-3 USA  
 MK452634 *Zinnia elegans* MVAP50000452 USA  
 MK452637 *Dahlia* sp. LM0P06825217-1 USA  
 MK452638 *Helianthus mollis* HMJAU-PM91851 USA  
 MK452639 *Helianthus* sp. HMJAU-PM91852 USA  
 MK452640 *Helianthus annuus* HMJAU-PM91853 USA  
 MK452641 *Dahlia* sp. HMJAU-PM91854 USA  
 MK452642 *Helianthus tuberosus* ERY057 Russia  
 MK452643 *Ageratina ligustrina* ERY015 Russia  
 MK452644 *Helianthus tuberosus* ERY061 Russia  
 MK452645 *Helianthus tuberosus* ERY081 Russia  
 MK452646 *Helianthus tuberosus* ERY094 Russia  
 MK452647 *Helianthus tuberosus* ERY152 Russia

***Golovinomyces ambrosiae* complex**

***Golovinomyces magnicellulatus***

***Golovinomyces circumfusus***

***Arthrocladiella mougeotii***

***Neoreysiphe galeopsidis***

***Erysiphe kenjiana***
