# Supplementary material for: Multi-locus phylogeny and taxonomy of an unresolved, heterogeneous species complex within the genus Golovinomyces (Ascomycota, Erysiphales), including G. ambrosiae, G. circumfusus and G. spadiceus
Source: PubMed Central journal article supplement (PMC7059721; doi:10.1186/s12866-020-01731-9), 2020-03-05
Supplement: 12866_2020_1731_MOESM2_ESM.pdf [file 12866_2020_1731_MOESM2_ESM.pdf]

MK452648 *Aster novi-belgii* HMJAU-PM91804 China  
 MK452650 *Aster novi-belgii* HMJAU-PM91806 China  
 MK452651 *Aster novi-belgii* HMJAU-PM91807 China  
 MK452652 *Aster novi-belgii* HMJAU-PM91808 China  
 MK452653 *Aster novi-belgii* HMJAU-PM91809 China  
 MK452654 *Ambrosia artemisiifolia* HMJAU-PM91810 China  
 MK452655 *Ambrosia artemisiifolia* HMJAU-PM91811 China  
 MK452656 *Ambrosia artemisiifolia* HMJAU-PM91812 China  
 MK452657 *Ambrosia trifida* HMJAU-PM91813 China  
 MK452658 *Ambrosia trifida* HMJAU-PM91814 China  
 MK452659 *Ambrosia trifida* HMJAU-PM91815 China  
 MK452660 *Ambrosia trifida* HMJAU-PM91816 China  
 MK452661 *Dahlia pinnata* HMJAU-PM91817 China  
 MK452662 *Dahlia pinnata* HMJAU-PM91818 China  
 MK452663 *Dahlia pinnata* HMJAU-PM91819 China  
 MK452664 *Dahlia pinnata* HMJAU-PM91820 China  
 MK452665 *Dahlia pinnata* HMJAU-PM91821 China  
 MK452666 *Dahlia pinnata* HMJAU-PM91822 China  
 MK452667 *Helianthus tuberosus* HMJAU-PM91823 China  
 MK452668 *Helianthus tuberosus* HMJAU-PM91824 China  
 MK452669 *Helianthus tuberosus* HMJAU-PM91825 China  
 MK452670 *Helianthus tuberosus* HMJAU-PM91826 China  
 MK452671 *Helianthus tuberosus* HMJAU-PM91827 China  
 MK452672 *Helianthus annuus* HMJAU-PM91828 China  
 MK452673 *Helianthus annuus* HMJAU-PM91829 China  
 MK452674 *Helianthus annuus* HMJAU-PM91830 China  
 MK452675 *Helianthus annuus* HMJAU-PM91831 China  
 MK452676 *Helianthus annuus* HMJAU-PM91832 China  
 MF612182 *Leucanthemum maximum* HMJAU-PM91836 China  
 MK452685 *Zinnia elegans* HMJAU-PM91842 China  
 MK452686 *Zinnia elegans* HMJAU-PM91843 China  
 MK452687 *Zinnia elegans* HMJAU-PM91844 China  
 MK452688 *Zinnia elegans* HMJAU-PM91845 China  
 MK452689 *Zinnia elegans* HMJAU-PM91846 China  
 MK452690 *Zinnia elegans* HMJAU-PM91847 China  
 MK452691 *Zinnia elegans* HMJAU-PM91848 China  
 MK452692 *Zinnia elegans* HMJAU-PM91849 China  
 MK452693 *Zinnia elegans* HMJAU-PM91850 China  
 MK452694 *Eupatorium japonicum* MUMH4142 Japan  
 MK452695 *Eupatorium makinoidi* GMUMH4143 Japan  
 MK452696 *Eupatorium japonicum* MUMH4424 Japan  
 MK452697 *Eupatorium makinoidi* MUMH7129 Japan  
 MK452698 *Eupatorium makinoidi* MUMH4794 Japan  
 MK452699 *Eupatorium japonicum* HMJAU-PM91855 Japan  
 MK452700 *Helianthus annuus* HAL 3299 F Switzerland  
 MK452704 *Zinnia angustifolia* HAL 2338 F Germany  
 MK452705 *Dahlia pinnata* MVAP50000445 USA  
 MK452706 *Zinnia elegans* M0P06825217-3 USA  
 MK452707 *Zinnia elegans* MVAP50000452 USA  
 MK452708 *Helianthus annuus* MVAP50000419 USA  
 MK452709 *Helianthus annuus* LM0P03825217-2 USA  
 MK452710 *Dahlia* sp. LM0P06825217-1 USA  
 MK452711 *Helianthus mollis* HMJAU-PM91851 USA  
 MK452712 *Helianthus x multiflorus* HMJAU-PM91852 USA  
 MK452713 *Helianthus annuus* HMJAU-PM91853 USA  
 MK452714 *Dahlia* sp. HMJAU-PM91854 USA  
 MK452715 *Ambrosia trifida* ISC-F-0076754 USA  
 MK452716 *Helianthus tuberosus* ERY057 Russia  
 MK452717 *Ageratina ligustrina* ERY015 Russia  
 MK452718 *Helianthus tuberosus* ERY061 Russia  
 MK452719 *Helianthus tuberosus* ERY081 Russia  
 MK452720 *Helianthus tuberosus* ERY094 Russia  
 MK452721 *Helianthus tuberosus* ERY152 Russia  
 MK452681 *Physalis alkekengi* HMJAU-PM91838 China  
 MK452682 *Physalis alkekengi* HMJAU-PM91839 China  
 MK452683 *Physalis alkekengi* HMJAU-PM91840 China  
 MK452701 *Eupatorium cannabinum* HML 3300 F Germany  
 MK452702 *Eupatorium cannabinum* GLM74796 Germany  
 MK452703 *Eupatorium cannabinum* GLM49501 Germany  
 MK452680 *Lycium chinense* HMJAU-PM91837 China  
 MK452677 *Leonurus artemisia* HMJAU-PM91833 China  
 MK452678 *Leonurus artemisia* HMJAU-PM91834 China  
 MK452679 *Leonurus artemisia* HMJAU-PM91835 China  
 MK452684 *Ulmus pumila* HMJAU-PM91841 China

***Golovinomyces ambrosiae* complex**

***Golovinomyces magnicellulatus***

***Golovinomyces circumfusus***

***Arthrocladiella mougeotii***

***Neoerysiphe galeopsidis***

***Erysiphe kenjiana***
