# Supplementary material for: Multi-locus phylogeny and taxonomy of an unresolved, heterogeneous species complex within the genus Golovinomyces (Ascomycota, Erysiphales), including G. ambrosiae, G. circumfusus and G. spadiceus
Source: PubMed Central journal article supplement (PMC7059721; doi:10.1186/s12866-020-01731-9), 2020-03-05
Supplement: 12866_2020_1731_MOESM4_ESM.pdf [file 12866_2020_1731_MOESM4_ESM.pdf]

MK452460 *Aster novi-belgii* HMJAU-PM91804 China  
 MK452461 *Aster novi-belgii* HMJAU-PM91805 China  
 MK452462 *Aster novi-belgii* HMJAU-PM91806 China  
 MK452463 *Aster novi-belgii* HMJAU-PM91807 China  
 MK452464 *Aster novi-belgii* HMJAU-PM91808 China  
 MK452465 *Ambrosia artemisiifolia* HMJAU-PM91809 China  
 MK452466 *Ambrosia artemisiifolia* HMJAU-PM91810 China  
 MK452467 *Ambrosia artemisiifolia* HMJAU-PM91811 China  
 MK452468 *Ambrosia trifida* HMJAU-PM91813 China  
 MK452469 *Ambrosia trifida* HMJAU-PM91814 China  
 MK452470 *Ambrosia trifida* HMJAU-PM91815 China  
 MK452471 *Dahlia pinnata* HMJAU-PM91818 China  
 91 MK452472 *Dahlia pinnata* HMJAU-PM91819 China  
 MK452473 *Dahlia pinnata* HMJAU-PM91820 China  
 MK452474 *Dahlia pinnata* HMJAU-PM91821 China  
 MK452475 *Dahlia pinnata* HMJAU-PM91822 China  
 MK389490 *Leucanthemum maximum* HMJAU-PM91836 China  
 MK452487 *Zinnia elegans* HMJAU-PM91842 China  
 MK452488 *Zinnia elegans* HMJAU-PM91843 China  
 MK452489 *Zinnia elegans* HMJAU-PM91844 China  
 MK452490 *Zinnia elegans* HMJAU-PM91845 China  
 MK452491 *Zinnia elegans* HMJAU-PM91846 China  
 MK452492 *Zinnia elegans* HMJAU-PM91847 China  
 MK452493 *Zinnia elegans* HMJAU-PM91848 China  
 MK452494 *Zinnia elegans* HMJAU-PM91849 China  
 MK452496 *Eupatorium japonicum* HMJAU-PM91855 Japan

*Golovinomyces ambrosiae* emend.

MK452476 *Helianthus tuberosus* HMJAU-PM91823 China  
 MK452477 *Helianthus tuberosus* HMJAU-PM91824 China  
 MK452478 *Helianthus tuberosus* HMJAU-PM91825 China  
 MK452479 *Helianthus tuberosus* HMJAU-PM91826 China  
 MK452480 *Helianthus tuberosus* HMJAU-PM91827 China  
 MK452481 *Helianthus annuus* HMJAU-PM91828 China  
 MK452482 *Helianthus annuus* HMJAU-PM91829 China  
 MK452483 *Helianthus annuus* HMJAU-PM91830 China  
 70 MK452484 *Helianthus annuus* HMJAU-PM91831 China  
 MK452485 *Helianthus annuus* HMJAU-PM91832 China  
 63 MK452495 *Zinnia elegans* HMJAU-PM91850 China  
 MK452498 *Helianthus annuus* MVAP50000419 USA  
 MK452499 *Helianthus annuus* LM0P03825217-2 USA  
 MK452497 *Helianthus annuus* HAL 3299 F Switzerland  
 MK452500 *Helianthus x multiflorus* HMJAU-PM91852 USA

*Golovinomyces latisporus* comb. nov.

63 MK452486 *Physalis alkekengi* HMJAU-PM91840 China  
 MK452459 *Eupatorium cannabinum* HML 3300 F Germany  
 MK452458 *Ulmus pumila* HMJAU-PM91841 China

*Golovinomyces magnicellulatus*

*Golovinomyces circumfusus*

*Erysiphe kenjana*
