# Supplementary material for: Multi-locus phylogeny and taxonomy of an unresolved, heterogeneous species complex within the genus Golovinomyces (Ascomycota, Erysiphales), including G. ambrosiae, G. circumfusus and G. spadiceus
Source: PubMed Central journal article supplement (PMC7059721; doi:10.1186/s12866-020-01731-9), 2020-03-05
Supplement: 12866_2020_1731_MOESM5_ESM.pdf [file 12866_2020_1731_MOESM5_ESM.pdf]

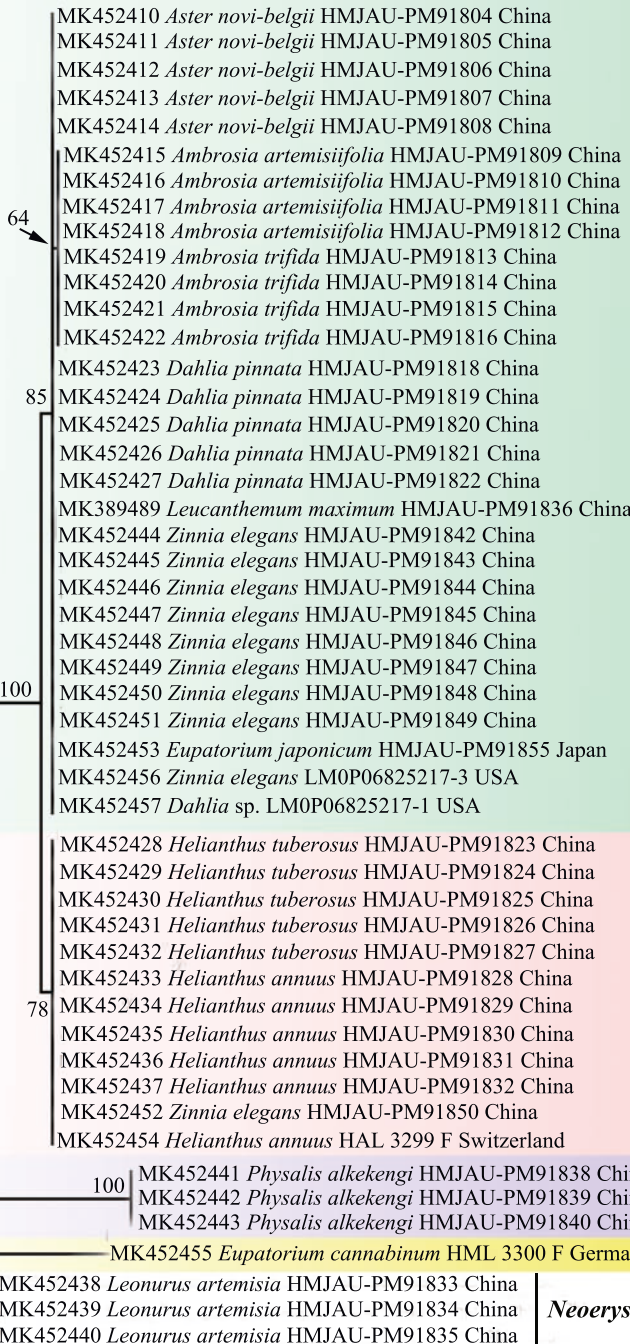

*Golovinomyces ambrosiae* emend.

*Golovinomyces latisporus* comb. nov.

*Golovinomyces magnicellulatus*

*Golovinomyces circumfusus*

*Neoerysiphe galeopsidis*
